# Supplementary material for: Active LaNi1−xFexO3 bifunctional catalysts for air cathodes in alkaline media
Source: Royal Society of Chemistry journal article supplement (doi:10.1039/c5ta01005e), 2015-01-01
Supplement: c5ta01005e1.pdf [file c5ta01005e1.pdf]

## Supporting Information

### Active $\text{LaNi}_{1-x}\text{Fe}_x\text{O}_3$ Bifunctional Catalysts for Air Cathodes in Alkaline Media

A. N. Daiwei Zhang,<sup>a,b,c</sup> A. N. Yufeng Song,<sup>a</sup> A. N. Zhenzhen Du,<sup>a</sup> A. N. Long Wang,<sup>b</sup> A. N. Yutao Li,<sup>b</sup> A. N. John B. Goodenough<sup>\*b</sup>

<sup>a</sup> School of Chemical Engineering, Hefei University of Technology, Hefei, 230009, P.R. China.

<sup>b</sup> Texas Materials Institute, The University of Texas at Austin, 1 University Station, C2201, Austin, Texas 78712.

<sup>c</sup> CAS Key Laboratory of Materials for Energy Conversion, Hefei, 230026, P.R. China.

\* Texas Materials Institute, Materials Science & Engineering Program, The University of Texas at Austin.

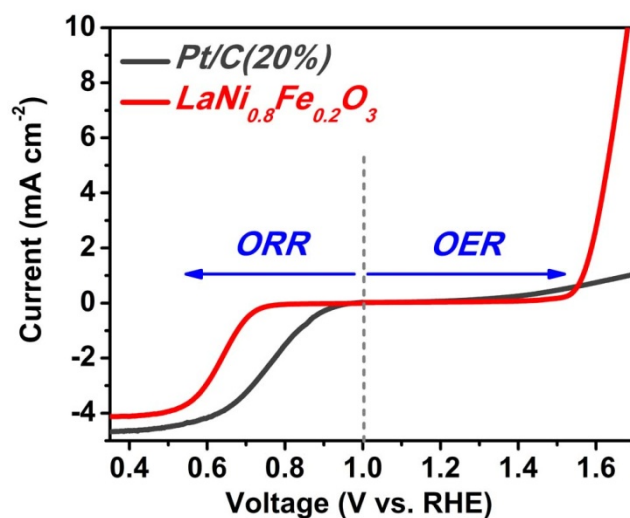

Fig. S1 Comparison of the ORR/OER polarization curves of  $\text{LaNi}_{0.8}\text{Fe}_{0.2}\text{O}_3$  and commercial Pt/C (20%) on glass carbon rotating disk electrode in an  $\text{O}_2$  saturated 1M KOH solution ( conditions: temperature --  $25^\circ\text{C}$ , sweep rate-- 5mV/s, rotation rate-- 1600rpm)

The electrocatalytic activity of  $\text{LaNi}_{0.8}\text{Fe}_{0.2}\text{O}_3$  for ORR/OER was characterized by linear scanning voltammetry (LSV) in 1 M KOH on a glassy carbon electrode and compared with commercial Pt/C (20%) (Figure S1). Pt/C (20%) has higher ORR onset potential and diffusion-limiting current than  $\text{LaNi}_{0.8}\text{Fe}_{0.2}\text{O}_3$ , while

$\text{LaNi}_{0.8}\text{Fe}_{0.2}\text{O}_3$  exhibits much higher OER current density than Pt/C.
